# Supplementary figures and images for: Synthesis and spectroscopic identification of nickel and cobalt layered hydroxides and hydroxynitrates
Source: Royal Society of Chemistry journal article supplement (doi:10.1039/d2dt03166c), 2022-01-01

(a)

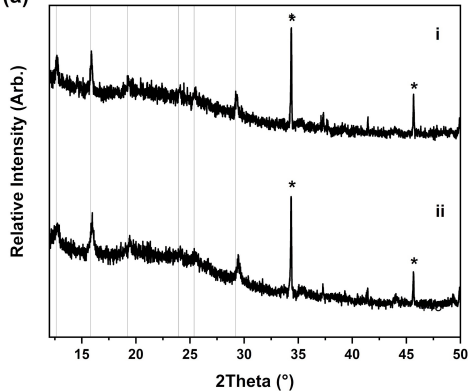

(b)

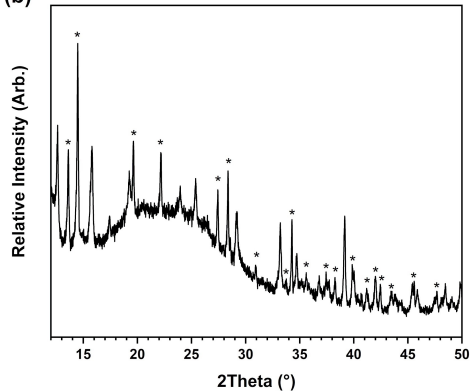

Supplement: d2dt03166c2.pdf [file d2dt03166c2.pdf]
